# Supplementary material for: Extracellular Vesicles Derived From Trichinella spiralis Muscle Larvae Ameliorate TNBS-Induced Colitis in Mice
Source: Front Immunol. 2020 Jun 11;11:1174. doi: 10.3389/fimmu.2020.01174 (PMC7300183; doi:10.3389/fimmu.2020.01174)
Supplement: Table S1 — Prediction of Ts-EV miRNA interactions with murine host target genes. Heat map corresponds to individual target genes in the murine host based on the 50 most abundant miRNAs by R package pheatmap. Functional map of Ts-EV miRNAs and murine host target genes categorized by ggplot2 package. [file Table_1.XLSX]

## Sheet: A-miRNA heatmap genes
miRNA	mean_TPM	Regulation of biological processe	angiogenesis	apoptotic process	autophagy	cell communication	cell cycle	coagulation	collagen	gastric acid secretion	immune response	muscle cell	receptor	regulation of gene expression
miR-540-3p	39640.7	100040999;100102;107747;108143;109264;109689;110826;11555;11606;11609;11785;11923;12028;12040;12048;12224;12387;12411;12894;13142;13731;13808;13857;14049;14056;140742;14377;14962;15257;15516;15902;16002;16331;16542;16653;16673;16832;16859;170768;17309;18035;18081;18124;18510;18641;18816;20293;20448;20661;20678;208146;208727;212032;21335;214685;215114;216739;21939;225651;232811;233575;238055;23837…	11540;11606;11609;13609;13731;13857;16542;23892;319594;73230	100040999;100861870;109689;11540;11606;11609;12028;12048;12325;12387;12824;12954;14049;14377;15257;16542;16859;171543;17762;18510;18667;19165;20661;212032;215114;21939;233575;245000;27050;50540;50873;54673;56312;56505;64383;64704;66262;71545;74747;75826;94275	100040999;11555;54673;56505	12461;12569;21454;54698;73182	101565;105837;11606;11785;12028;12048;12325;12539;12569;13518;13857;14056;14539;14581;14962;15902;16002;16319;16542;17218;18124;18973;19165;19363;20678;208583;212032;216166;216233;21939;22142;227613;245000;27050;30948;320172;330228;434130;50873;54418;54673;64383;67064;68379;68964;69077;69191;69274;69710;70681;71375;72836;74369;75079;75826;99412	100040999;11418;11555;11746;12028;18816;19165;215114;30060;56505;71753	12824;18816;20293;23892	108664;11418;14473;171209;208890;238377;69847	100102;108101;108143;109689;110379;110557;110854;11540;11606;11609;11746;11774;118453;11923;12028;12164;12231;12266;12325;12387;12539;13518;13609;13731;13854;13855;140806;14226;14370;14473;14539;14581;14939;14962;14998;15000;15002;15019;15257;15379;15516;15902;16002;16177;16198;16331;16399;16408;16542;16653;16859;17025;170711;17309;17318;17888;18035;18124;18213;18816;18970;19155;19165;192236;1924…	100861870;11555;11606;12164;12387;13609;13808;13857;14056;140781;16002;16542;16765;16859;17318;17888;17906;18213;18667;18816;19185;20308;20661;208727;214968;218194;22370;235574;23892;23966;23967;319594;320365;53322;54631;64383;67765;68750;69179;71545;73230;74007;74237;99412	109689;11540;11555;11609;12028;12325;12387;12569;14602;16971;18667;19165;224129;232431;23893;26385;56278;64383;71729	14056;16859;18973;23892;27632;56347;668137;68379;69920;74370
miR-8325-3p	13736.1	104174;105940408;107581;108989;109115;109785;11730;12825;13361;13405;13667;13871;14013;14026;14268;14317;14783;14870;15183;16210;16846;171504;17342;17692;17954;18125;18126;18479;19415;20451;20678;21405;214579;215001;21858;22213;223649;226352;238377;23988;241639;26437;26439;26992;320472;373852;432486;52690;54126;54357;55951;56327;56334;56392;59025;59035;64930;66841;67203;68606;68943;68961;69802;70…	11730;16846;18125;238130;52679;57342;81702	12421;12765;14870;15183;16905;19777;20482;21940;240518;241656;244237;27061;58231;68943;80280;93672;97165	68943	114873;11572;18646;19294;216963;22787;22789	108989;12447;13490;14783;16332;16362;16905;18126;18973;20482;20678;215378;216963;22088;223922;22404;225326;226591;22680;237891;23988;26992;51813;52679;54139;56089;56194;57784;619441;65964;66801;67203;67903;68943;69583;70887;72415;80280;81702;83770	26437;26439	11541;12825;57264	14473;16210;20927;238377	105940408;106795;108101;108989;109648;11541;11727;11730;12265;12326;12478;12765;12825;12931;13349;13361;13405;13490;13590;14013;140806;14268;14419;14473;14586;14683;14870;15183;16332;16362;16401;16579;16846;17059;17342;18125;18126;18479;19217;19266;19294;19334;19415;19777;20359;20482;214150;214968;217369;21844;21858;21940;22032;22138;22213;225326;226591;229700;229898;23792;238377;238871;23988;239…	100038489;117606;12765;12825;13405;13590;14026;14783;15183;16211;16332;16846;18479;18933;21405;214968;21952;22138;22680;237891;238130;23886;238871;23988;50876;54126;56275;57264;57342;57784;64930;66898;67203;67903;78321;81702	105940408;11541;13490;13590;14823;16332;16846;18125;18126;229700	106795;13667;16210;18126;18973;21405;332397;67543
miR-1692	11352	108058;21745;80913		108058;21745			108058;21745				108058;11989;21745;241035	108058		223527
miR-10833	9544.74	102182;104831;105450;12154;12177;12395;12411;12428;12458;13665;14013;14186;14219;14376;14377;14538;14775;15275;15587;16842;16867;18671;192119;19419;21413;22059;22172;227326;228714;235533;237038;23801;56233;58805;69601;69807;72978;73251;74155;79459;81601;99890	105450;16842;21413;56233;69193	12177;12325;13051;13665;14377;14775;14827;15587;16842;170725;192119;21413;22059;237038;326623;50527;66626;69601;69807	12177;22059	12462;225825	105835;105837;107951;108689;12325;12428;14775;18671;192119;21413;22059;22172;226151;228714;235542;237038;237256;23980;244694;26446;54601;58805;69601;74117;81601	326623	14219;18451;74155;76293	171209;237038;66333	103806;107321;108909;110115;12267;12289;12297;12325;12402;12428;12458;13051;14013;14219;14256;14362;14538;14586;14775;14924;15587;16411;16842;171285;17329;17969;17986;18387;18843;19172;192119;19334;19419;19719;20259;20288;20357;21413;22059;22318;223989;225825;227326;228368;237256;240095;242100;246177;26446;26971;320705;326623;329547;50908;54131;56233;56506;58205;66626;69193;69601;69807;71648;7411…	103806;11518;12154;12155;12332;13051;14256;14362;14775;16842;170725;17329;192119;20259;21413;22059;238057;54601;54650;56233	103806;105450;12325;14602;14823;16842;18387;69601;74155	13665;13669;18971;21413;22059;226151;244694;81601
miR-2904	9193.5	109241;11350;12035;12258;12505;12822;13134;13142;13207;13380;13667;14061;14317;16673;16859;17300;17772;17967;18102;18193;19280;20320;209692;21752;227290;22761;228003;239719;268510;329065;50907;57741;630952;68054;70503;72400;74114;74763;76487;76499	12505;12540;227290;630952	103844;11350;12505;12822;13207;14102;16859;16880;17300;18772;21752;223870;382985;57741;637515;66839;67379;80707;83945;94275			103844;107951;11350;12035;12540;12566;12795;13077;13134;14539;17219;18571;208084;20878;216150;231600;26951;271278;66616;67444;71007;71846;72400;76499;78803;78926	12258;14061;223870;637515;83945	12406;14061;17300	211286;53416;71597	109685;11350;11498;116849;11765;12229;12258;12274;12505;12540;12566;12654;12953;13380;14061;14102;14104;14241;14539;16157;16859;17300;17772;18019;18102;19245;19266;19344;195359;19656;20309;20361;20845;20897;213435;214321;216150;216892;21752;224014;224143;22761;22793;233079;236312;236511;240754;26403;26414;268857;329693;353156;384997;50929;54445;57741;58205;59288;630952;637515;64009;64654;66102;67…	100463519;12345;13207;13380;14061;16325;16859;17300;17772;18019;20681;208158;20878;20897;213435;21752;22761;228003;228788;23886;23966;239719;68054;76499;78926	108068;109241;14061;14686;14807;20320	109241;12566;13134;13667;16859;244551;76582
miR-10242-5p	8827.61	100502698;107823;110380;110391;12945;14609;18214;20441;216021;21838;22436;23876;331026;407821;56458;624582;64103;66725;67338;71389;74012;76192;76487;78928	14609;22436;81702	21929;21942;22436;54711;66725;67338			107823;15381;216021;21929;52696;57028;57749;66725;77579;77744;81702	22436	18214	140494;14609;331547	107823;108086;108679;114249;12519;13136;13137;13848;14390;14609;18405;18406;19336;19344;19736;216021;21838;21929;21942;21949;224143;22436;26413;407821;435921;56458;65963;664805;67338;68861	110380;114249;11459;14609;18214;68861;74012;81702	14773;19736	56458;71389
miR-64-3p	7141.36	110380;12168;12562;12799;14063;14421;15163;15213;15289;16168;18008;18024;18595;18799;19419;21388;216021;217082;22422;227231;231532;23967;268977;269224;329065;56505;628431;68964;71090;73750;75458;76055	12168;12562;15213;15289;18024;52679	12633;13511;18024;22422;244237;268973;56505;69635;76987;93672	56505	20778	12799;13874;13982;15289;18008;18024;18514;18973;209091;216021;22153;26972;328440;399599;52679;56431;57784;66971;68964;71521;78926	12633;14063;18024;18595;268973;56505	12818;268977	269224	107065;11302;12121;12488;12562;12916;13019;13070;13874;13982;14063;14972;15163;15213;15289;16168;16669;18514;19330;19401;19419;20358;20778;216021;216505;217069;22422;231532;234663;239528;242202;244237;246779;268973;268977;269016;319481;329693;380924;435565;54170;54448;628431;630499;64291;668303;68964;69635;75458;78926;93672	106042;110380;12168;12488;12818;13874;15213;15289;18024;21388;217082;22422;23967;268973;52335;57784;628431;65256;66139;72313;78926	12121;12671;18595;26385	18024;18973;217082;223691;239528
miR-11633-3p	6110.51	108155;110391;11502;12339;140742;14763;15117;15277;15558;16825;17283;17999;18005;18028;18096;18125;18598;19057;19340;208285;214579;21761;22751;228026;23881;23967;24069;24111;26416;268510;268936;30841;53310;56334;56613;58805;624582;72567;74012;74126;74498;78783;79221;79459	18125;26416;79221	11800;12070;12167;15510;16410;18095;19057;21944;22062;228026;23873;67184;72567;73699;74126	13853;192656;22333;60321	13838;229715;269878	116871;12611;13424;14202;14763;15171;17218;17283;17886;18095;22062;26416;27223;57441;58805;619441;67629;68431;69581;74498	12070;15510;18095;224794	11800;237360;24111	19141;69847	108148;108155;108723;11502;12167;12193;12611;13424;13618;13838;13853;140580;14784;15117;15510;16410;16825;17085;17283;17886;17999;18019;18095;18125;18162;192656;19340;20997;217864;21897;21944;22027;22062;22215;228026;234515;23873;23881;23917;240354;24069;24111;26407;26416;277854;319480;338355;52822;53310;56613;619441;67184;67778;68861;74342;75219;93897	101994;108155;13618;15117;15558;17283;17886;18005;18019;20204;20997;218194;22062;224794;228026;23967;24111;242050;26416;56758;68861;74012;79221	108072;11553;14688;17999;18095;18125	12193;18028;208922;20997;22062
miR-3488	4566.77	109934;11747;12018;12349;15930;16582;17194;17703;22187;320472;57246;63873;67673;76487;83557	109934	103844;107765;114716;12018;192231;22187			103733;103844;108097;192231;22187;226591;229285;235406;51869;56469	11746;11747;12018		110935;12349	107765;109270;109934;114716;11746;12018;12349;14159;15930;17025;17194;17268;19249;20186;20360;210757;22187;22632;226591;239528;24116;433899;56436;56469;63873;67581;67673;68708;72147	103733;107765;114142;14159;27206;57246;63873	14773;56436	239528;24116;27979;51869;56436;67673
miR-10b	4557.37	100503117;107351;107829;109905;114676;11739;11789;11856;11865;11910;12020;12039;12125;12183;12361;12490;12491;12822;12915;12945;12977;14562;14584;14718;14733;14755;14933;15109;15163;15194;16548;17171;17240;17385;18010;18012;18033;18091;18126;18389;18510;18754;18805;19013;19056;20371;20378;20448;20474;20638;20698;214572;214855;219131;22361;22413;22415;228026;228790;230676;269400;269610;277328;2785…	109905;12490;20312;320739	11739;11789;11910;12125;12822;14103;15194;16324;18012;18091;18510;18573;19192;19373;19645;20312;216742;22361;22413;228026;231130;269610;414801;627984;66626;66824;70369;73181;76854;78365		107934;12491;12745;67331	107829;11789;14184;14559;15512;16571;170625;17219;17988;18010;18012;18126;18754;18951;19192;19645;19659;208084;20852;21376;22361;26443;269400;30951;320022;54601;56716;636931;66067;66508;69274;70369;70601;72041;72611;76854;93898;97122;98733	12125;12490;12491;14103;22413;627984;66824	109905;12814;14264;17385;30951	13040;14103;14466;18173;18389;27060	100017;105352;106565;106947;107351;107515;107829;108101;108960;109905;11486;11500;11789;118453;11865;11910;12125;12490;12491;12495;12503;12518;12977;13842;13854;13855;140571;14159;14184;14256;14466;14718;14843;15024;15163;16185;16192;16324;16571;17059;170741;171211;17171;17240;17441;17988;18010;18012;18033;18126;18131;18173;18754;18805;19013;19056;19192;19245;19342;19373;19376;19645;19659;20312;2…	107351;11459;11739;11789;11865;12491;12814;14159;14256;14559;14562;14733;15194;16324;16571;17868;18091;18754;19645;20312;20474;20665;20670;20969;217847;21915;22018;22413;22415;227377;228026;23805;51885;54601;56471;67272;73181;76901;78365;93689;93898	11486;11556;14686;18126;22413;228790;381853;83554	12491;16865;18012;18091;18126;18968;19013;20638;20672;208691;214572;53415;654804;76582
miR-9712-3p	4320.1	11502;12190;12393;12562;12978;13666;13835;14694;14739;15439;15481;170768;17356;17387;17967;17979;18016;18424;18655;18741;18999;19062;193034;19414;22346;22349;22422;225888;225913;22631;226352;22751;228607;238505;23945;23967;24047;244416;319710;50918;53412;56233;625342;66617;66904;67040;67460;68468;71472;72843;77124;80913;80915;83408	11539;12562;22346;381823;56233	106869;107607;12190;13421;13666;14694;15481;22349;22422;22631;434825;54722;56462;68576;77124	107607;27801;77124	16136	100038464;12190;13197;13924;14694;15170;15481;18016;18432;211770;223593;22596;338352;66713;674895;68468;68999;69028;70799	107607;13666;14694;17387;56462		193034;52055	107338;107607;11495;11502;11539;11808;12504;12562;12978;13197;14694;15170;15439;15481;16136;17002;17129;17318;17387;17393;18016;18212;18550;18843;18999;19062;19122;192194;19277;193034;19331;19414;20304;20351;207667;211770;217864;22346;22412;22422;22631;226541;226744;228607;235497;238505;23921;24047;246727;327959;53901;547431;56233;56622;66713;68468;68576;70799;74637;77124;83408	12344;12978;14739;15439;15481;17129;17318;17387;18550;18741;18999;19062;20190;20304;22349;22422;23967;320502;434825;56233;67040;67092;67155;70799;71472;74183;77124	11539;20304;56278;77124	12190;13666;18999;235497;71902;77124
miR-11912	4296.46	100037258;108903;12343;14245;15245;16011;16535;19013;20472;209692;22751;23989;24047;24087;26416;59030;78928	13636;26416	12343;21672;27280;66191		13838;22141	100037258;16362;16483;18951;19356;242705;26416;67064;71521;74369	12343;21672		16535	11807;12343;12362;12986;13636;13838;15416;16362;18390;19013;20821;21672;22141;22694;240055;24047;26416;27280;54612;64009;71770	108100;12343;12362;14245;16011;21672;228788;24087;26416;66747;68041;73804	12343;16011;18390;232431	100037258;16535;19013;22715
miR-571	3968.83	103784;104570;116891;12116;12224;12458;13548;14661;16847;18701;19218;20346;214855;217212;21814;218518;21937;22408;228026;230784;231327;236900;23892;23999;252973;268697;26992;50918;52906;66214;68010;68750;71753;77124;77781;93840	13846;18701;21814;23892;66214	11516;13548;217558;21814;21937;228026;237313;66214;67991;77124	77124	13844;20346;69376	104156;105988;13982;14050;14579;20843;22340;226154;231327;268697;26992;66214;67991	19218;71753	23892;66214	171209;19218;19326	100504333;101568;11516;11767;11840;11898;12458;13982;14370;15162;17025;17888;192167;19218;19326;19342;19720;20346;21814;21937;22340;22408;228026;23892;23921;242202;266632;432466;52906;54624;59287;66214;68010;76905;77124;93840	12340;15162;17888;19712;21814;22340;22408;228026;23892;23999;241431;268697;269713;68750;69179;76905;77124;93840	19218;22408;77124	17937;23892;54624;77124
miR-12225-3p	3735.66	100043305;107747;108989;109552;114886;11816;12040;12282;12550;12912;13138;13383;13666;13728;13731;14008;14026;14049;14180;14625;14670;14758;15117;15227;16331;16336;16476;16828;16840;16870;170768;17283;18089;18103;18106;18601;18709;18736;18854;19013;19159;192786;19878;20446;20541;208146;208677;20901;21380;216821;217588;21761;21849;21926;22003;22226;22337;22411;22414;22422;225020;22627;22628;22629;…	11816;13731;14180;19878;20349;207728;23938;320739;66214;68678;69660;79221	11797;11920;12070;12282;12824;13163;13479;13666;14049;14670;15894;16450;16453;18854;19099;19165;19367;19878;21380;21926;22337;22422;22627;22628;22629;227753;23938;50930;54711;56484;56486;66191;66214;66505;66725;67956;68943;69660;75734;76080;79263;80280;80751;83946;93734	24088;68943	12466;13383	107995;108989;11636;116871;11787;11920;12144;12444;12455;12550;13163;13404;13489;14180;14579;14670;16551;16798;16882;17283;17997;18286;18769;18854;19054;19165;19355;19367;19684;19891;20227;210766;216846;21849;21926;224008;226026;22627;22628;22629;230103;231327;24061;241764;244281;245670;246735;26965;28000;381629;51810;56468;56484;56692;66214;66515;66725;67078;67455;67849;67956;67981;68475;68612;6…	11816;12070;13666;18854;19165;21926;76080	114886;12406;12824;22226;66214	14466;22226;67470	100038358;100504404;108989;109552;110542;111173;11465;11797;11816;11920;12144;12289;12912;13019;13138;13163;13383;13479;13489;13731;14008;14109;14118;14255;14366;14466;14670;14683;15117;15227;15894;16331;16428;16450;16453;16476;16691;16882;170676;17283;17826;17975;18089;18103;18106;18205;18693;18854;19013;19099;19165;192897;19401;19731;19878;20016;20227;20349;20355;20404;207728;20901;209488;21372…	110075;11459;11565;11797;12069;13163;13383;13489;14026;14180;15117;15227;16336;16476;16551;16765;17283;17826;17997;18205;19684;20349;20541;208158;20901;213582;21380;21393;214968;21832;21926;22003;22422;227753;23886;384061;50930;50932;66898;68678;70550;71785;71982;72330;74318;79221;97064	13489;14118;14602;16840;17237;18736;19165;21926;229007;56468;83946	12912;13666;17975;18854;19013;19285;20016;21399;224008;27103;64424;664799
miR-27b-5p	3215.26	110460;11666;12343;12494;12578;12774;13385;14011;14369;14371;14660;15445;16002;16621;16869;17240;18008;18125;18976;19013;19280;193034;20174;20296;20447;207965;212427;21335;213464;21676;21803;22061;22341;223513;22402;230676;231327;23801;23876;240879;320404;328949;381280;442801;54485;55985;56397;56406;56722;58198;64242;671535;68732;68964;69536;70456;71093;71562;71764;72333;74053;74126;77782;99010	108961;12540;12774;18125;21803;22341;50501;54485;55985;71093;73230	12343;12578;12774;12824;14066;14827;18828;209456;21652;22061;228866;56772;67755;68655;69169;74126	20787;213948;228361	59083	108961;12445;12540;12566;12578;14559;16002;16881;18008;18196;18286;19054;19362;20877;21652;21803;22061;225849;231327;235320;55993;56692;63955;64242;68964;69917;70231;77782;93898;98558	101533;12343;12578;14066;15442;16621	12824;20296;21803	14466;193034	12229;12343;12445;12494;12540;12566;12578;12774;13385;14369;14371;14466;16002;16621;16776;16881;17240;17318;18019;18125;18828;18976;19013;19268;193034;20185;20296;20310;20359;20562;20597;20821;20877;21335;21652;21803;21869;21949;22061;22341;22428;22793;228866;234779;235320;237310;241289;320404;330122;54485;55985;56692;56722;66443;671535;67771;68964;69169;71538;72049;74614;75345;75788;77782	11464;12343;14066;14369;14559;15442;16002;16497;17318;18019;19268;20877;21803;22061;22341;22402;23956;278725;50501;54485;56397;65256;68655;71093;73230;93898	12343;13492;14675;18125;19268;20174	12566;13435;19013;20185;20787;21340;21803;22061;54427
miR-7548	3165.57	100503117;102632;102693;104263;104418;108030;109785;11364;116701;11835;12161;12227;12394;12759;12822;12912;12977;13433;13876;14173;14718;15107;15161;15275;15398;15468;15488;15558;16449;16825;16997;170574;17385;17523;17872;17927;17954;18015;18119;18121;18145;18750;18764;18854;192176;19218;19415;20698;20855;209630;213452;21385;215114;216019;216821;216856;21849;22187;22260;22415;22433;224727;224912;…	107817;11622;13876;14173;15370;18015;18750;18764;50754	11607;11835;12759;12822;12824;14066;14601;15370;15398;15468;15894;171580;17685;18015;18095;18854;18952;215114;22163;22187;22433;224727;226830;26941;432777;50754;50755;53619;56215;56462;57913;66593;66961;83946	20787;50754	107817;14131	104418;11607;12570;12631;12702;14179;14208;14559;15398;15468;17314;17685;18095;18286;18393;18750;18752;18764;18854;19684;215445;216233;21849;22142;22187;223593;224727;226591;232314;239336;240843;242705;26972;27354;319944;381921;50754;50755;51812;53598;56742;57913;58805;66398;667034;66713;66801;69535;78610;83946;93898	14066;18095;18750;18854;19218;215114;432777;56462;57913;58992;66593	12824;17385;18015	19218;26373;27060;57138;71111;72961	104418;107817;11607;11622;11835;12262;12268;12394;12496;12631;12702;12759;12912;12921;12977;13030;13136;13390;13854;14131;14159;14173;14179;14601;14718;15162;15468;15894;16177;16449;16800;16825;16997;17174;17685;17872;17916;18002;18015;18095;18119;18503;18600;18750;18752;18764;18854;19218;19268;19376;19415;19698;19731;20698;207393;207667;21354;21385;215114;216233;218772;218877;22142;22143;22163;2…	11622;12161;12702;13549;14066;14159;14179;14559;14560;14561;14601;15162;15558;16449;16800;16997;17075;17927;18015;18119;18121;18740;18750;18764;192176;19268;19684;19712;20393;20741;208158;21385;217866;22415;22433;233066;23886;24087;26564;57246;58992;66826;66961;71950;72674;74007;77446;93898	11835;18095;18121;18764;19218;19268;213452;224116;229700;26941;83946	11622;11835;12227;12912;18854;192176;19704;20382;20787;21385;53415;54196;66653;98053
miR-5106	3144.37	100470;101401;101543;102162;105675;107823;11609;11684;11730;11816;12041;12161;12168;12263;12335;12395;12484;12638;13035;13481;13608;13731;13837;13876;15163;15200;15466;16189;16210;16400;171504;17385;17913;18260;18412;19014;19159;19207;19242;20371;20671;20682;207742;20779;207958;20855;20963;215456;215493;217664;21814;22061;22342;22346;22433;224727;226182;227095;233549;23807;23939;240057;24087;2419…	11609;11684;11730;11816;12168;12652;13731;13836;13876;21814;22346;280635;503844;54409;75723	105675;11609;11684;12167;12367;12484;12638;16189;16973;18174;18260;18828;19766;20682;20710;20779;21814;22061;22433;224727;230379;23939;27279;442820;53380;54409;56215;65106;66191;70445;74126;93692	18412;245860;26417	13508;13837;21454;235106;50935	107823;114714;11479;12263;12367;12544;13490;13518;13709;15242;15574;16189;16402;16553;16973;17865;18286;18514;18813;19014;19087;19646;19659;20779;20852;211660;22061;223922;224727;229841;234736;237886;23939;243978;26440;269400;271278;448987;53380;55938;56086;56708;56710;56716;66413;66971;69912;70238;70385;72391;74369;77579;93692;99412	11684;11816;12638;18174;20963;230379;26437;26438;26439;268860;442820;545925;56868;65973;68668;71145;72242;74413	11541;11595;17385	11595;15466;16210;20779;76257	101401;101568;107566;107823;108153;108960;110382;110542;11307;11479;11541;11609;11727;11730;11776;11816;12167;12263;12367;12484;12519;12638;12652;12769;13035;13490;13518;13608;13709;13731;13836;14276;14990;15163;15239;15242;15976;16189;16400;16402;17086;17123;18514;18578;18600;18613;18707;18722;18828;19014;19122;19172;19368;19411;19659;19766;20022;20211;20219;20290;20297;20371;20388;20682;20710;2…	11479;11576;12023;12161;12168;12335;12340;12638;13709;15200;16189;16325;16563;16973;17865;19014;19205;19888;20671;20682;20779;20897;21814;219103;22026;22061;22433;229841;231602;235574;24087;30053;434246;50915;54409;634340;66898;66999;78552;99412	108069;11541;11609;12638;12652;13490;14686;14823;15242;15466;19737;20779;26385;270118;280635;434246;93692	16210;18789;19014;20022;20671;20963;21429;22061;226182;27224;56009;56347;66420;67673;68979;70238
miR-2-5p	2924.55	110651;14062;15488;16413;22436;22628;277753;30954;71090;72511;75826	16413;22436	110651;11998;14062;16403;22436;22628;30954;75826			105835;12160;22628;75826	14062;22436	14062		100017;110651;14062;16403;16413;20187;22436;30954;333715;56224;67295;67605;68259;68877	12160;14062;72511	12160;13488;14685	110651;68877
miR-6165	2885.66	100470;102162;102182;109264;110695;11601;11793;11819;12125;12159;12512;12591;13075;13383;13587;13728;14055;14056;140570;14085;14168;14319;14538;14599;14605;14723;14729;15186;15275;15365;15450;15466;16182;16644;16646;16803;16890;17126;17692;17973;18106;18133;18176;18383;18439;19878;20445;20448;20541;20544;20661;21336;213389;21388;215001;217127;217303;21752;21951;22171;22239;22413;22627;226976;2308…	11540;11601;12159;15945;19878;54611;67653;67916	105349;11540;12125;12159;12323;12385;15510;15977;16403;170755;17126;17973;19165;195046;19878;20661;21752;22030;22413;22627;245000;26918;450219;50527;54218;55948;56642;56772;637515;66143;67338;68020;68350;73699;76987;80751	11793;213948	12721;13383;18646;269878;68585	100088;102423;104271;107047;108689;116871;11819;12159;12323;12427;12700;13587;14056;14168;16571;17126;17973;18426;18973;19165;20399;20479;213389;223593;22404;22627;22634;229285;235406;237887;23988;245000;26918;27401;30949;384619;433416;497652;54218;54611;55948;56469;57261;57296;58805;636931;66515;66591;67153;67653;68567;69260;69270;70601;72415;73902;74549;75828;83770;99152	12125;14068;14723;14729;15510;16644;17126;19165;192188;195046;20344;22413;233405;637515;68350	12159;56429	12425;14599;15466;171209;19326;20544;208890;20927;228355;27409;76257;76524	100038947;102626;105886299;109700;11303;11307;11540;11601;11628;11793;11813;12125;12159;12163;12231;12267;12273;12297;12323;12493;12496;12509;12512;12560;12627;12721;12771;12773;12805;12922;13075;13216;13383;13617;13861;13870;140484;140571;14068;14252;14538;14599;14605;14997;15162;15354;15510;15945;15977;15985;16182;16403;16415;16571;16803;16911;17126;17293;17686;17973;17986;18011;18106;18133;181…	100534273;102423;11564;12159;12163;12425;13039;13383;13617;14056;14068;14168;14252;14605;15162;15945;16571;17069;171170;17126;17754;17897;18133;18176;18933;19267;20344;20541;20661;208158;21388;21752;22018;22413;228788;233066;23886;239719;23988;433416;50490;54381;56642;56758;57246;66826;67272;67653;67916;69260;72511;76365;76703;78925	11540;12323;12509;12560;13492;14599;15466;19165;19736;22413;333883;56318	12159;12273;14056;16890;17973;18973;319955;56642;57261;58523;64340
miR-37-5p	2841.74	100102;100502630;100504467;100859931;103135;105943584;107351;108954;109815;11350;11549;11838;12036;12162;12180;12458;12583;12799;13132;13167;13207;13481;13548;13804;140481;140570;140858;14756;15184;15368;15525;15874;16153;16160;16509;16992;16997;17127;17158;17199;17311;17703;17777;17938;17967;18015;18024;18028;18453;18609;18648;18746;18761;18770;18803;18814;19043;19242;19414;20203;20230;20356;203…	13636;14756;15184;18015;18024;18803;18814;20356;21814;280635;68678;73723;75596;81702	100038595;100043189;100502630;100859931;106759;109815;11350;117198;11838;11998;12162;13032;13063;13132;13163;13207;13548;13804;15368;15499;16153;16160;16973;17127;17938;18015;18024;18436;18573;18609;18611;18706;18759;18761;195046;19645;20356;20437;20656;20682;216799;216805;21814;21937;22163;223453;22654;231130;234371;235323;23830;24105;241196;269610;28240;53619;55948;56215;64113;64704;66262;66861…	20787;22241;22333;56456;74244	114873;11497;12775;13003;14134;16136;18646;20356;50935	103135;11350;116871;11735;11792;11838;12162;12544;12799;13132;13163;13616;13685;13804;14208;14254;15499;16160;16973;17127;18024;18196;18393;18453;18611;18647;18761;18858;18950;18951;19054;19090;19645;20227;20656;20742;209027;215445;216805;216810;22634;22687;232341;234371;234664;235323;23988;24056;241593;244879;381629;50791;55948;56036;56739;60344;66983;67054;67153;68501;69171;69191;70891;72772;75…	106759;11418;13032;13063;13852;170786;17127;18024;18436;18761;192188;195046;216799;21824;223453;26437;30060;56745;65973;68668;72828	12406;12815;18015;18706;76293;81877	11418;11419;12622;14600;14672;14756;16509;20911;21819;232341;244646;27060;67470;76257	100038993;100039796;100102;103135;106759;107351;108101;108679;109815;11350;11498;11534;11549;11838;12162;12265;12297;12298;12458;12493;12504;12507;12775;12798;12815;12922;13032;13132;13163;13537;13543;13601;13615;13616;13636;13860;13861;14012;140806;14106;14119;14134;14254;14582;14600;14825;15024;15368;15499;15958;15985;16136;16153;16158;16160;16161;16170;16192;16407;16419;16543;16590;16800;16992…	100038595;100043189;107351;110075;11459;117606;11838;12162;12180;12292;12340;12508;12667;13132;13163;13207;13860;14106;14825;15184;15499;16211;16590;16800;16973;16997;17127;17311;17329;17938;18015;18024;18442;18746;18761;19267;19645;19888;20203;20682;20742;20901;209039;210029;212514;21386;216805;21814;21954;22041;22138;238057;23830;23947;23967;239719;23988;24051;241593;244667;268859;278725;50791;…	12622;14119;14672;16153;268934;280635;433586;50791;66968;71729	13132;140858;15368;17938;17975;18024;18028;192170;20021;20787;214572;22083;229906;235497;276770;58523;654804;66317;66405;66420;668137;67005;77011
miR-10597d	2513.2	100312986;104174;13610;14605;14874;16334;18028;18472;18563;20662;20700;20701;20702;21821;432486;52123;59022;64103;80288;80913	13610	16334;19367;21419;224105;67169		12064	104271;13559;16334;16589;18472;19367;209334;224105;54369		12406		11690;12064;13052;13559;13610;13618;140579;14605;15452;15957;16334;17129;18472;18693;18861;20662;20739;21821;224105;56310;67169;80288	108100;12064;13052;13618;14605;16334;17129;20739;20743;210029;23947	21821	18028
miR-4175-3p	2453.14	11838;15277;21872;64384;67956	21872	11838;13163;67956		14131	11838;13163;326619;66180;67956;71702;74393				11838;13163;14130;14131;226541;319583;326619;64384;74393	11838;13163;74393
miR-124b-3p	2432.46	14371;27205		13032			56150	13032			13032;14371;27205;75607	26556	108068;26556	223691
miR-4710	2389.75	100037258;100134861;100502630;100503619;100705;102693;103988;104158;107829;108030;108655;109934;11596;11602;11666;116891;11737;11843;12048;12091;12180;12263;12282;12335;12390;12411;12458;12896;12915;12985;13001;13115;13138;13142;13167;13200;13386;13478;13857;14049;14168;14183;14186;14251;14421;14460;14609;14702;14755;14869;14870;15223;15439;15450;15466;15587;15901;16160;16582;16680;16825;17385;17…	109934;11602;13001;13857;14183;14609;14702;15901;18760;19878;20583;207728;22339;503844	100502630;100503619;108705;11596;12048;12282;12390;12954;12955;13051;14049;14066;14251;14460;14601;14869;14870;15587;15977;16159;16160;16324;16880;16973;170725;17395;17948;18174;18759;19192;192119;19878;20583;20723;216439;21652;21942;21945;22339;237038;26427;27280;381308;56717;57320;57913;637515;66437;66626;67755;68349;68845;70445;71514;73689;75734;76987;78688;79201;79202;80280	108083;117150;13853;18475;20788;227738;228993;56717	107934;20778;207818	100037258;105948585;107829;107951;11792;12048;12263;12390;12537;13001;13857;14168;14183;14251;14457;14539;15170;15512;16159;16160;16362;16973;17218;17350;18004;18014;18196;19082;19164;19192;192119;20460;20678;216150;216233;21652;216810;217708;21849;22339;22404;227937;229841;235320;235542;237038;24061;240843;244495;244694;246735;26429;26441;30923;328440;384619;399599;50523;50791;53817;56706;56708;…	101533;12390;14066;15442;15451;16612;16622;17387;18048;18050;18174;19123;19164;192188;20344;224794;57913;637515	11595;11596;12815;16917;17385;18451;22226;268977	11419;11595;11944;12733;140494;14609;15466;16531;208890;22226;237038;57138;58991	100503619;102657;103988;104709;105352;105948585;106512;107829;108655;108909;109934;11480;11596;11602;11727;11773;12263;12268;12273;12390;12458;12478;12501;12518;12525;12815;12985;12986;13001;13051;13138;13386;13853;13854;13861;140484;14159;14191;14251;14281;14347;14362;14370;14460;14539;14601;14609;14869;14870;15170;15223;15434;15439;15451;15587;15977;16159;16160;16162;16181;16324;16362;16428;164…	100534273;108655;109242;111186;114142;11480;11518;11596;12180;12292;12335;12390;12955;12985;13001;13051;13857;14066;14159;14168;14183;14251;14281;14362;14601;14609;15439;15442;16324;16325;16612;16622;16973;170725;17318;17329;17387;17826;17948;18019;18048;18050;18198;18205;18209;18442;192119;20190;20259;20304;20344;20460;20586;209039;210029;217082;217692;21877;22339;22408;224794;229841;234593;2388…	108068;11596;12390;15466;19164;20304;208188;22339;22408;224116;232431;234593;240025;270118;50791;70008;80794;83554	100037258;105948585;12273;20020;20383;20586;20788;20926;217082;239528;244694;54427;56717;57320;67065;68219;68845;70408;77011;80905
miR-6763-5p	2323.92	100470;102633315;102693;104263;107351;107771;107829;109115;117149;11806;11818;11983;12043;12051;12091;12315;12411;12443;12741;13115;13138;13142;13383;13385;13640;13649;13653;13829;13876;14417;14460;14464;14534;14573;15109;15112;15183;15186;15376;15402;15439;16201;16331;16400;16803;16842;16878;170768;17257;17309;17342;17703;17869;17877;17878;17928;18022;18102;18119;18126;18193;18563;18640;18736;18…	13609;13876;15945;16842;20356;21814;503844;55985;56737;630952;68992;75723;80903	107771;108705;11608;11818;11983;12043;12050;12051;12167;12367;12955;13078;14082;14460;14563;14573;15183;15235;16163;16842;171580;17869;19367;19373;194735;20356;21410;217558;21814;21841;21933;21945;22062;22631;228775;228866;23939;450219;56636;56737;59004;66626;67169;67184;72609;74754;79202;83945	14534;73674	12801;13383;13640;20356;22787;94332	100732;106014251;107771;107829;11608;11735;11787;11792;12043;12160;12315;12317;12367;12443;12444;12531;13197;13400;13649;13709;13710;14841;15381;16183;16878;17222;17869;17928;18004;18018;18126;18286;19054;19181;19365;19367;20877;20913;21750;218294;22062;22172;225160;22634;228775;229285;235406;23834;23939;245670;26395;268451;330177;330228;384619;50796;52468;52563;53598;55982;56371;56431;66616;6706…	107771;11818;13829;14082;15376;17869;18791;19124;56737;74754;83945	11541;12831;13078;74155	11419;11945;11966;171209;20317;54411;72585	100017;100041294;102633315;106014251;106572;107351;107771;107829;114570;11541;11608;117149;11806;11807;11818;11836;11989;12043;12051;12167;12315;12317;12367;12443;12504;12525;12531;12630;12741;12770;12801;12986;13030;13078;13138;13197;13383;13385;13609;13618;13640;13649;13653;13709;13710;13829;14082;14133;14276;14281;14460;14573;14924;15002;15039;15051;15162;15183;15218;15235;15376;15379;15402;15…	107351;107771;114142;11818;12043;12160;12955;13078;13383;13400;13609;13618;13653;13709;13710;13829;14281;14563;15162;15183;15439;15550;15945;16842;16878;17129;17869;17877;17878;17928;18119;18213;194735;20181;20665;20866;20877;21814;22041;22062;228785;232174;233066;23886;259300;278725;53376;57246;63873;665113;67300;68750;71371;72609;73703;74007;98366	11541;12160;16842;17965;18126;18736;213452;56737;74155	100041294;106014251;110809;14534;15376;17257;17928;18126;19181;20020;20672;20922;21410;21429;22062;223691;235626;239528;26395;55982;60365;71389;74370;74737;76246
miR-3150b-3p	2303.15	100043597;100126224;100379610;104158;104776;109815;116891;11845;12177;12411;12752;12822;13177;13207;13478;13649;13829;13876;14183;14319;15469;15874;16002;16598;17772;18195;18389;18803;19091;19123;20262;20442;20447;212032;21745;21939;223513;22431;224727;227743;233066;234724;24071;26367;268859;26912;27878;329559;381286;383548;53869;54326;56373;57261;60595;654804;66629;67041;67078;67653;67673;67800;…	11539;13876;14183;18803;67653;68792	105722;109815;11477;12177;12367;12822;13207;212032;21745;21939;21987;22030;22431;224727;232679;26408;414128;54683;66437;70369;76854	12177;228361;245860	12468;12767;229715;64931	100503104;11477;11491;11629;11853;12223;12237;12367;12531;12544;13649;14050;14183;14184;14235;16002;17988;18195;18286;212032;21745;218793;21939;21987;223922;224727;22671;227210;233231;235406;26429;30939;53869;56706;57261;619441;66156;66515;67078;67181;67653;68612;68999;69077;69583;70369;72836;74549;75613;76854;83770;83922	100126224;105722;13829;19091;19123;56373;78808	54683	12752;18389;213788;23920	100043123;100043125;100379610;100504404;102626;105722;107338;109270;109815;110854;11302;11441;11477;11491;11539;11629;11845;11989;12163;12367;12480;12531;12560;12767;13024;13025;13030;13070;13214;13649;13829;13867;14184;14479;15465;15469;15985;16002;16179;16365;16421;16428;16598;16994;17057;17059;171283;17174;17772;17988;18019;18390;18442;18803;18843;19116;19277;19342;19401;20016;20262;20304;2035…	105722;11477;11491;11629;12163;13207;13367;13829;14183;16002;16563;17772;18019;18442;20190;20262;20304;212999;215257;233066;23920;26408;268859;329559;407831;414128;53869;56373;67653;74490	11477;11491;11539;11552;12560;12669;13492;15465;18390;20304;213788;24071	14235;20016;21399;54683;57261;654804;67673
miR-1412	2216.53	102247;104009;104174;104570;109115;109934;114229;114868;11549;11806;11909;12041;12258;12313;12591;12649;12799;12894;13478;13829;13871;14011;140570;14061;14158;14183;14268;14573;14583;14870;15117;15587;16150;16151;16772;16885;16890;171207;17172;17292;17698;17978;18008;18081;18222;18226;18700;18741;18816;19042;20174;20230;20320;20346;20445;20471;20520;20698;208146;210009;211323;214133;214505;216440…	109934;14183;15370;19876;21872;94175	106759;11477;11757;11909;12366;12955;13511;14066;14573;14870;15370;15499;15587;16151;16159;16323;16880;171543;18413;18706;195046;19876;208449;20846;211323;229317;29810;382985;414801;450219;50873;58231;59040;70861;74754;79201;79202;93895;99571	228993	100038460;19261;19876;20346;22157;94332	104156;107976;11477;11909;12313;12366;12544;12649;12702;12799;13077;14183;14254;14726;15499;16159;16323;16362;16493;17988;18008;18413;18950;19087;19181;19355;20609;216233;226154;231600;232944;233406;235406;238271;242705;320595;378430;381921;50873;54130;57028;59126;66508;67071;71007;71733;72611;74754;78833;81601	106759;114868;12258;12366;13829;14061;14066;14726;18816;195046;19876;20846;21922;243862;26436;319415;385643;434540;68668;72242;74754;94175;99571	12406;12815;14061;18706;18816;216725;22226	110895;11945;12426;213788;22226;228355;244646	100038460;102545;104886;105446;106759;109820;109934;112419;11307;11477;114868;11498;11549;11690;11776;11806;11909;12193;12258;12313;12478;12524;12627;12702;12815;12922;13537;13601;13829;14061;14106;14158;14191;14254;14268;14573;14582;14683;14784;14870;14997;15117;15499;15587;16150;16151;16159;16162;16171;16179;16323;16362;16365;16409;16493;16885;16897;16994;17057;17059;170676;17085;171211;17172;1…	100534273;106042;106393;11459;11477;12702;12955;13660;13829;14061;14066;14106;14158;14183;14726;15117;15499;16323;17292;17318;18741;18816;19094;20305;20471;20741;20743;211323;212514;227377;23805;29810;329559;54126;64099;65112;66860;77446;93840;94175	105171;11477;14061;16012;16971;20174;20320;208188;213788;56436;60409	12193;16151;16890;19181;20382;20683;229317;378430;53415;54427;56347;56436;654804;67071;81601
miR-9830-5p	2138.6	100683;102774;103135;107435;107766;11600;11806;11848;12036;12227;12257;12395;12490;12534;12593;14067;142980;14309;14376;15111;15259;15365;15461;16201;16337;171530;18035;18226;18472;18563;19126;19228;19279;19414;20346;208177;20848;208677;216440;216560;21926;22034;22113;22349;228019;237222;23876;30805;328949;329065;384783;53412;56312;56397;56745;654804;67673;68845;69983;70791;73086;73608;74195;7510…	11600;11848;12490;65255;69983	114716;11600;11998;12421;13043;14629;15111;18607;18828;21652;21926;21942;22349;233020;23992;30955;414801;56312;59004;66961;68169;68428;68655;68845;74006;79202	12257;13043;74006	19261;20346;94332	100683;102774;103135;11600;116871;11848;12234;12534;13006;13616;14202;15461;16337;18472;18751;19646;19891;20218;208084;211978;21652;218294;21926;22137;237256;237886;237887;243978;27401;276950;66165;67054;67296;67724;69983;70238;70681;71846;73139;75178;75669;75828;77065;98496;99152	12490;192188;212943;21926;56745;69540;69983	12831;171530;30955	11975;208890;21819;27060	100702;103135;107065;108151;109042;114716;11480;11498;11600;11806;11848;12229;12234;12257;12490;12524;12525;12798;13616;14067;142980;14309;14347;15111;15259;15461;15502;16198;16337;16407;170749;171530;17472;17686;17975;18035;18131;18226;18472;18607;18751;18828;19261;19279;192897;19376;19414;19934;20307;20346;20562;20848;209488;210757;21415;214321;216505;21652;216560;21844;21847;21926;21942;22034;…	102774;11480;11576;11600;11848;13043;14489;15111;15461;171530;18607;18751;20024;20307;21926;22349;22370;228421;237222;23897;28146;384783;56397;56508;634340;66961;67092;68655;69983;74183;98496	14816;21926;226720;229007;231125;67296;69983	12227;15111;17975;18789;21415;22034;22715;654804;67673;68845;70238;74195;98053
miR-126-3p	2088.94	102632;102902673;11652;16400;19653;20356;20963;22339;67299;74143;80913	107029;20356;22339	11652;18174;20356;22339;74143		20356	11652;20460;218294;22339;245670;26441;67299;76843	18174;20963;65973			11652;13070;15130;16400;17393;17472;20356;20963;22329;22339;245670;26441;268933;53791;67581	102902673;11652;19653;20460;22339	22339	102902673;19653;20963
miR-7108-3p	2065.41	102247;105787;107351;108079;109552;110651;114774;117149;12013;12156;12394;12581;13010;13016;13871;14026;14421;14729;14783;16412;16825;171207;17155;17192;18028;18091;18103;18472;18534;18626;18764;19052;19207;19271;19280;19305;19335;20454;20602;20656;208936;212427;214579;216131;216440;22289;22411;225895;22630;226352;230815;231293;231510;233765;237222;23945;268980;26914;319594;320404;320995;353187;3…	13010;15405;16412;18764;19271;319594;381823	105782;110651;12366;12581;13063;17279;18091;18759;19317;20439;20656;216869;217558;21848;224105;22630;228866;236732;26931;50873;59041;64213;69807;72565;74143;83383;98267	108079;192656;64143;67443		105782;105787;108079;109113;116871;11853;12013;12366;12581;12611;12795;14783;15574;16332;16412;16553;16589;16906;18472;18538;18764;19052;20227;20609;20656;216846;224105;22630;231724;231803;232341;241764;26914;26931;28010;319944;330177;381629;50873;52563;56190;56289;56350;57765;59036;59046;64143;66067;66671;67151;68193;69716;71701;72391;72787;72949;83383;98496	114774;12366;13063;14729;19271;208936;233405;64213	12831;13010;16412;237360	18484;18534;19349;232341	101476;102626;105782;105787;107351;108079;109552;110651;11302;114774;11486;117149;11773;11840;12156;12289;12394;12611;13543;13867;14191;14784;15405;15502;16332;16412;16421;16669;16825;16897;170644;170711;170749;17536;17826;18103;18212;18472;18626;18764;19052;19152;192199;192656;19271;19335;19338;19349;20185;20227;20609;20656;208936;213233;214968;216869;22031;22289;224105;22411;224143;224640;22654…	105787;107351;108079;12156;13367;14026;14783;16332;17755;17826;18091;18209;18764;19271;19317;214968;227377;228788;237222;237542;238057;29857;319594;328580;353187;56190;64213;66978;76108;78925;98496	11486;12156;13488;16332;18764;19271;216869;229007;246103;64213	110651;12156;12581;18028;18091;19704;20185;20602;21429;225027;226432;332397;56190;66671;72308;83383
miR-252	2043.13	12313;12335;225888;353187;73390;94175	94175				12313;21402	13646;94175			12313;20716;21402;225471;319190;319817;67979;94175;97998	11464;12335;353187;94175
miR-4127-3p	2028.67	106529;109241;13132;14573;19043;20563;270669;50768	20563	13132;14573;50768			100041230;12572;13132;13557;238011;319155;319156;319157;319158;319159;319160;319161;320332;326619;326620;69386;71375;76454;97122	50768			100041230;13132;13557;14573;16145;17969;19043;20563;21355;21847;22778;319155;319156;319157;319158;319159;319160;319161;320332;326619;326620;50768;57266;69386;75863;97122;98053;99470	13132;242050;57266;76454	109241	109241;13132;22778;56347;619332;98053
miR-252b	2020.34	12313;12335;225888;353187;73390;94175	94175				12313;21402;21749	13646;94175			12313;20716;21402;225471;319190;319817;54450;67979;93675;94175;97998	11464;12335;353187;94175
miR-252a	1981.67	12313;12335;225888;269224;353187;73390;94175	94175				12313;21402;21749;70231	13646;94175		269224	12313;20716;21402;225471;319190;319817;54450;67979;93675;94175;97998	11464;12335;353187;94175
miR-4008b-3p	1690.4	100039957;101543;104318;108937;110460;11430;11854;12822;12895;12974;12977;13016;13036;13138;13665;14085;14465;14702;14745;14874;15040;15377;15587;15900;16182;16598;17126;17171;17342;17692;17977;18010;18133;18260;18389;18510;18626;18984;19042;19280;19302;19305;20371;20544;20583;20692;215456;216456;217335;21821;21833;22411;22418;22422;225020;22761;230639;235041;235505;23939;239719;26433;26569;26925…	13609;14702;17095;20583;20692;216527;22418;280635;52679;69983;76089	105349;12143;12325;12822;13036;13665;14563;15040;15587;17126;171543;18260;18510;18984;20583;217011;21848;22062;223453;22422;23939;432777;56428;56484;56772;66168;66961;74919;93672		11820;17470;19649;21454;22418;260299	104318;108937;11820;12234;12325;12577;12974;14465;15040;16402;16881;17126;17886;18010;19090;19360;20227;22062;22418;227937;230861;231724;234857;235041;23939;259279;268451;271278;27401;30951;330177;399599;434130;52679;56289;56484;56708;66369;67629;68468;69983;70799	11418;13036;15442;17126;223453;259277;30060;432777;69983	237360;26433;30951	110895;11418;18389;19349;20544;331547;72585	101809;104709;110542;11754;11820;12007;12143;12234;12269;12298;12325;12577;12630;12771;12977;13036;13138;13609;14119;14388;14465;15015;15024;15039;15040;15051;15587;15900;16161;16179;16182;16402;16568;16598;16881;17123;17126;17171;17342;17886;18010;18133;18407;18626;18693;19042;19090;19245;19349;19649;20085;20186;20227;20347;20371;20583;20692;21355;21454;217011;21821;21828;21833;22040;22062;22345…	103768;104318;11854;12155;12577;13609;14465;14560;14563;14745;15442;17126;17886;18133;21833;22062;22418;22422;22761;239719;259279;26564;434246;50876;65112;66961;67155;68371;69654;69983;70799;74116;74490;78552	12325;14119;20238;21821;231125;23894;270118;280635;434246;69983	13665;15900;17937;22062;24116;27224;69833
miR-1755	1647.5	110460;11688;11812;15469;15587;16189;16210;16449;18700;18760;19013;20296;20447;22218;269523;29875;381813;68292;69068;97064	18760;19876;69068	15587;16189;19264;19876;269523		19876;21367;69286	16189;19264;22088;226591;271278;72124	19876;269523	16948;20296	16210	11688;11812;13590;15469;15587;16170;16189;16449;16534;17776;17826;18011;19013;19264;19876;20296;20821;20969;21941;226591;230405;29875;384059;50884;69068;72124;72462;80885;83671;97064	13590;16189;16449;17826;19264;20969;320202;665113;70218;72124;97064	11688;13590;21367;320202	16210;19013;208595;545725
miR-1842	1581.68	100470;100502698;107771;108903;109264;109934;110213;110279;114713;116939;12013;12053;12305;12315;12390;12554;12737;12759;12778;12894;13115;13482;13829;14371;14417;14731;14756;15042;15200;15277;15468;15587;16509;16825;16840;16870;171281;17156;17171;17240;17257;17691;17698;17869;17913;18015;18016;18022;18193;18604;18606;18627;18645;18708;18761;18984;19015;19128;19157;19204;19211;192119;19218;19246;…	109934;110279;12554;12652;13836;14756;18015;18654;30878;66214;68678;73230	100043813;105722;106298;107607;107771;110213;11758;11998;12049;12143;12390;12633;12759;12778;12995;15042;15387;15468;15587;16818;17869;18015;18708;18761;18984;19211;192119;19223;19246;20437;21410;22062;22164;223453;223701;223870;22627;22631;229722;231130;237313;24105;26427;319801;50996;54683;55948;57294;57434;57741;57913;59009;66214;67772;68020;70861;74256;74919	107607;108121;229722;245860;319801;56480	140792;14129;22157;268902;330908;67331;68585;76088	100043813;100861753;105948585;106014251;107771;114714;12013;12315;12390;12531;12532;12568;12995;13197;13589;13684;14179;14559;15042;15114;15381;15468;16882;17222;17869;18016;18571;18647;18761;18858;19084;19211;192119;19651;20399;208628;211586;211660;21376;21678;217410;22062;22164;22410;22627;229841;234854;23825;239083;26395;271278;27223;28113;319801;330228;368203;434130;51791;52696;52808;55948;56…	100043813;105722;107607;107771;12049;12390;12633;13829;14598;16818;17869;18761;19128;19218;223453;223870;57294;57913	11758;12406;16917;18015;19015;54683;66214;67772	11419;12425;14756;16509;18173;18484;19218;20604;22259;74096	105722;105948585;106014251;107607;107771;109934;110213;110279;111970;11303;114713;11807;11876;12000;12053;12121;12143;12268;12305;12315;12390;12504;12531;12554;12560;12652;12759;12778;12803;13197;13430;13482;13813;13829;13836;13861;140580;140792;14118;14129;14174;14179;14370;14371;14388;14598;14683;14960;15042;15162;15284;15387;15468;15587;16172;16408;16439;16818;16825;16882;17125;17129;17171;171…	105722;107771;11519;12390;12425;12568;12803;13589;13829;14174;14179;14559;14561;14566;15162;15200;16498;170484;17125;17129;17341;17691;17755;17869;17884;17888;18015;18708;18761;19015;19084;192119;19246;20295;21388;214968;218194;22003;22062;22138;22350;223701;22408;22410;226751;227377;229841;235574;239719;23999;241431;244667;269713;30953;319801;434246;52892;54650;57266;57810;67155;68678;69726;7198…	108072;11423;12121;12390;12560;12652;13430;13488;14118;14686;16840;19218;19223;19246;20238;22408;231125;434246	105948585;106014251;106298;108121;11758;12305;15387;16909;17257;18459;18708;20185;21343;21410;22062;22410;229906;239528;26395;27632;319955;54683;67005;67772;68184;69745;72308;74370;75686
miR-499b	1535.34	268859									14924;19334	18198;268859
miR-4075-5p	1383.44	102693;109241;11482;11806;11812;11843;12018;12048;12142;12391;12512;12550;12554;13433;13807;13819;13829;13876;140481;14061;14534;14660;14723;14739;15357;15404;15468;15481;16430;16867;17386;17698;18193;18214;18223;18226;18242;18453;18563;18604;18609;18642;18753;18799;192176;19274;19419;20194;20230;20375;20410;20451;20583;20663;20750;20869;21416;21676;218518;21937;22350;22418;22421;230801;230815;23…	107029;107817;11482;12554;13846;13876;15357;20349;20583;22418;22421;50501;54409;613258;94175	11607;11758;11798;12018;12048;12364;12633;13043;14629;14827;15357;15468;15481;16450;16880;16905;18609;18753;19317;19766;20375;20583;21416;21937;22038;22184;24105;320769;52538;53357;53380;54409;56532;56717;57741;637515;68169;69601;72565;72609;76854;77124	13043;14534;22084;56717;77124	107817;12465;12775;22418;64931;71740	11607;11787;12048;12283;12455;12550;12631;13077;13874;13982;15468;15481;16905;17886;18453;18712;18769;19164;19188;19385;20869;21416;216049;22145;22418;225326;230857;23997;26429;26430;271278;328440;50875;51812;52468;53380;54130;56717;66713;668110;67299;69237;69601;69754;70620;72124;76854;77782;83558	12018;12633;13829;14061;14723;15451;18753;19164;22278;637515;94175	11758;14061;18214;320769		101568;102545;107065;107817;109593;11307;11482;11607;11806;11812;11989;12018;12142;12298;12391;12509;12512;12554;12631;12775;12902;13034;13430;13829;13874;13982;14061;14241;14479;14732;14924;15357;15404;15451;15465;15468;15481;16181;16407;16450;16534;16822;17886;17888;18226;18733;18753;19164;19188;19339;19419;19766;20230;20349;20375;20404;20583;20663;20750;20869;20890;209012;20910;21355;21416;219…	11482;11798;12391;13043;13819;13829;13874;14061;140781;14739;15357;15481;16510;17868;17886;17888;18214;18753;192176;19317;20349;20869;21416;217866;22084;22184;22278;22350;22418;22421;235574;23805;23956;23966;50501;50875;54409;56717;66860;66898;66978;72124;72330;72609;74116;77124;94175	109241;109593;12509;13430;13492;14061;14685;14807;14823;15465;19164;224129;66968;69601;70008;77124	109241;110809;11758;13819;14534;170472;192176;209011;21416;223691;320769;53356;56347;56717;66317;66653;71389;74737;77124
miR-6131	1346.56	100504239;100504346;100504362;100862177;105450;109821;11863;12168;12591;12895;12945;13010;13075;13345;13665;14013;140481;14317;14463;14745;14756;14828;15183;15213;15404;16825;17127;17701;17938;18127;18389;18477;18481;18606;18640;18753;18829;19226;19229;19414;20448;20679;20700;20701;20702;215001;216021;21838;22239;223774;22393;224727;227231;233765;23923;244416;26436;270198;30805;319710;378425;4324…	105450;12168;13010;13609;14463;14756;15213;19229;75723	103844;12365;12981;13665;14828;15183;16410;16973;17127;17701;17938;18753;19229;20438;20709;22393;224727;236732;53380;57434;57875;57913;64704;68428;71514;72565;73181;73689;93672	72145	12775;12801;17470;50935;94176	103844;109333;12034;13490;13518;13685;16973;17120;17127;17193;17701;18018;18286;18752;18813;18973;19651;20460;211978;215378;216021;224727;226409;227613;258706;26429;26442;26965;27214;28135;404316;50796;53380;56398;57913;63986;66671;68298;69008;71514;73902;83560;83770;99152	109821;11746;12365;13648;16612;16616;16622;17127;18048;18753;22278;26436;57913	13010	14756;18389;21819;56398;71111	100504239;100504346;100504362;100689;100862177;102103;102722;105446;108909;109333;11542;11746;11891;12034;12266;12496;12757;12773;12775;12801;12929;12981;13057;13075;13345;13349;13490;13518;13609;13841;14013;14463;14747;14828;15183;15213;15404;15434;15985;16186;16409;16410;16625;16825;17120;17127;17175;18018;18477;18481;18752;18753;18829;19155;19229;19267;19268;19414;19656;20186;20335;20357;20592…	114142;12168;13169;13609;13648;14463;14745;15183;15213;16612;16616;16622;16973;17127;17701;17938;18048;18481;18753;19229;19267;19268;20460;207495;209039;20997;22278;52023;63986;67092;67272;73181;73804;74237;76108	105450;108071;110355;11542;13490;19268;20238;231125;268934;69296	11863;13665;17701;17938;18127;18973;20997;21415;54709;55944;66671;75030;83602
miR-4618	1342.24	101540;104009;107586;12387;140742;14538;18005;20441;21416;22041;26458;331623;50918;53897;54409;56086;59022;66208;68563;71890;72043;75766;77782;79459	101540;54409	12387;21416;217558;235323;54409			101540;13404;17248;17988;18647;21416;235323;56086;71890;77782	18791	76293		101540;107586;109593;12192;12229;12387;14538;16145;16423;17988;21416;215821;22041;329659;384997;66212;67525;75766;75985;77782	12387;18005;21416;22041;338346;54409	101540;109593;12387	13436;21416;225027;71890
miR-34f-5p	1328.14	15258;16151;16485;18634;209354;21380;216188;72043;74364;76192;76487		14048;15258;16151;21380;227154;23950;67991	225131	12511;17984	12795;14048;15258;217124;225131;227154;229543;239336;67991;68014				110595;12504;12511;13716;14048;15258;16151;16179;20821;21380;217124;239336;26456;56457;68089;71779	15258;171170;21380;26556;76365	13488;26556;67298	13716;15258;16151;209354
miR-27c-5p	1270.13										16197
miR-7648-5p	1259	100503619;110695;11350;12035;13016;140742;14175;14625;15234;15357;16842;17210;18145;18627;18669;19769;216825;217351;232811;244667;26419;52906;56863;636931;67556;69726;70456	14175;15357;16842	100503619;11350;14082;14175;15234;15357;16842;16905;17210;19317;19823;21942;23830;26419;70861	60321	107934;13003	103733;106014251;11350;12035;12448;15234;16905;17210;17218;18432;18669;21749;225182;22589;26446;332110;50721;56350;58230;636931	14082;19823		11944;14672	100503619;106014251;11350;11480;11808;13618;14082;14114;14924;15234;15357;16842;17873;19769;20018;20350;20562;213326;21942;22370;235130;23917;241035;244667;26419;26446;52906;54131;58230;67065;67694	103733;11480;13618;15357;16842;19317;22370;22682;23830;244667;50721;69726	13429;14672;15234;16842;213326;229007	106014251;20018;208922;217351;58230;67065
miR-10758	1231.55	102633315;103784;108030;11555;11745;11747;11835;12039;12190;12226;12394;12945;13385;13486;13605;13731;14055;14168;14178;14309;14464;14583;14734;15040;15109;15258;15468;15507;15558;16151;16201;17878;18035;18038;18145;18294;18519;18534;18601;18787;18803;19415;20674;208258;208266;20848;208727;20901;217410;21824;21833;22113;22239;22654;227326;23938;23945;24087;244416;26409;26554;269424;26946;27220;27…	11745;13731;15507;18803;20349;23938;66214	107765;11800;11835;12190;12226;12954;15013;15040;15258;15387;15468;15507;16151;18787;22184;22654;23938;26946;329581;433287;50768;54218;54673;57875;66214;667803;69635;73699;99982	11555;54673;74244	100043314;11497	12190;12447;13605;14168;15013;15040;15258;15468;15507;170625;17120;18294;18519;20674;211651;216810;217410;234069;234852;240843;259279;26554;269424;271278;384619;54218;54418;54673;59125;66214;66589;667803;66801;67054;68379;68755;78896	11555;11747;18787;21824;50768	116872;11800;66214	12425;18534;27220	100038993;100043123;100043125;100043314;100503545;100529082;101142;101613;102633315;106572;107765;109820;110557;110558;116872;11745;11835;12231;12259;12394;12606;13072;13385;13605;13731;14178;14309;14419;14734;14961;14964;14972;14980;15007;15013;15015;15016;15018;15019;15040;15258;15387;15400;15468;15507;15958;16151;16158;16162;16404;16912;17120;18019;18035;18038;18787;18803;19172;19208;19268;193…	107765;110075;11555;12226;12425;13008;14168;14178;15258;15558;16498;17754;17878;18019;18787;19268;20349;20674;20740;208727;20901;21833;21924;22184;22371;24087;242620;259279;30838;329581;434204;54140;56758;67155;99982	108068;11553;11555;11835;16601;19268;224116;229007;232431;270118;319405	11835;12190;15258;15387;16151;18519;20022;208595;21415;545725;56009;654804;68184;68379;74370
miR-7190-3p	1206.48	100134861;100504467;101540;104570;107260;110351;12043;12048;12359;12895;13345;13831;14011;14462;14661;16010;16600;16772;16974;17156;17859;18035;18038;18242;18642;19206;19219;19417;19883;20666;20682;21407;21416;21679;21808;22003;22349;22411;22418;22654;234724;237222;270198;27220;29876;320655;329065;329559;330554;331623;384783;51886;53897;54126;54140;56449;66083;67574;67956;71472;73608;77305;77781;…	101540;11535;13846;14462;16600;216527;22418	106298;12043;12048;14272;14462;16600;16974;20682;208449;21416;21808;22349;22654;56449;67755;67956		22418	101540;107260;107995;110052;12043;12048;14155;14235;14559;15381;18715;19076;19200;19206;21416;21808;22319;22418;22591;320022;330177;63986;66165;67956;69077;69260;72787;74596;79566;84092;93898		21808	11944;11974;27220;29876	100504333;101540;107260;107392;109042;110351;11535;11840;11991;12043;12266;12359;12627;12802;13345;140580;14241;14272;14462;14586;14784;15417;16404;16600;16974;17474;17859;17932;17986;18035;18038;18457;19219;19277;19338;19883;20682;20997;21416;21808;21844;22319;224014;22411;22418;22437;225164;235497;241919;27220;27226;330177;330817;384783;56791;59003;66083;66467;67116;67525;69077;69260;71956;7384…	11416;11535;11567;117606;12043;13831;14559;16974;170484;171170;18740;19219;19230;20682;20743;20997;21407;21416;21808;22003;22349;22418;237222;329559;384783;54126;54140;54650;54720;56449;63986;67971;69260;71472;74596;78798;93898	101540;108071;11535;11552;16010	106298;14235;14462;16600;20382;209011;20997;21416;235497;56347;66467;664799;73830;74370
miR-16c	1131.51	100040843;100201;100303738;100502698;100503117;100705;102162;103583;103963;104009;104570;104831;105450;105675;105943584;107351;107829;108030;108155;108903;109815;110213;110695;110829;110842;11350;11409;11602;11674;11856;12048;12091;12116;12168;12189;12258;12583;12705;12752;12759;12822;12842;12912;12974;12977;12985;13036;13117;13138;13142;13200;13207;13388;13405;13555;13829;13835;13857;13871;14008…	105450;11540;11602;12168;13388;13857;14815;17128;18015;18132;18750;19130;19664;20423;21814;22421;232906;30878;381823;54409;56233;71690;78560	105349;105675;106869;107607;108705;109815;110157;110213;11350;11540;12048;12049;12050;12062;12189;12367;12385;12633;12759;12822;12824;13032;13036;13063;13163;13207;14082;14869;14870;15042;15257;15468;15510;15587;16009;16438;16450;16453;16973;16974;17005;170755;17127;17279;17938;18015;18518;18793;19099;19192;192119;19223;19664;20315;20423;20438;20617;208449;209456;21416;21652;21745;21814;21942;219…	107607;20773;218832;22185;257632;268656;56505;56717;73674	12064;14131;19261;20778;225825;229715;238680;72832	103583;105837;105988;107047;107829;107951;108689;11350;114714;11636;11787;12034;12048;12144;12189;12234;12367;12544;12566;12572;12700;12974;13163;13197;13400;13518;13555;13709;13857;13858;13982;14208;14211;14453;15042;15171;15381;15468;16553;16798;16878;16973;17113;17127;17274;17314;17688;18126;18426;18453;18671;18749;18750;18950;19014;19076;19130;19192;19200;192119;19247;19252;194655;20184;20617…	107607;12049;12258;12633;13032;13036;13063;13829;14082;14598;14729;15510;170786;17127;18750;192188;20617;208936;243862;26420;26437;26754;56462;56505;56868;57913;72242;83945	12824;12831;12842;16917;18015;26433	108664;11881;11944;11966;12725;12752;14599;14611;14672;18389;18430;18484;20544;20604;20927;22259;228355;238377;26373;50500	100038993;100201;100303738;101314;101613;102626;103583;104099;106565;106572;107351;107607;107829;108148;108155;108156;108723;109270;109815;110157;110213;11302;11308;11350;11488;11540;11542;11602;11668;11674;11773;11776;12000;12034;12062;12064;12144;12164;12231;12234;12258;12367;12500;12504;12507;12525;12566;12705;12725;12759;12769;12912;12977;12985;13032;13036;13137;13138;13163;13197;13388;13405;…	100303738;107351;108155;12023;12064;12164;12168;12332;12508;12667;12705;12985;13163;13207;13388;13400;13405;13542;13618;13709;13829;13857;140781;14256;14745;14815;15439;16009;16190;16326;16336;16476;16878;16973;16974;17005;17075;17113;17127;17128;17329;17684;17700;17938;18015;18080;18133;18209;18479;18481;18750;18762;18793;19014;19130;192119;19267;19664;20203;20315;20423;20481;20866;208727;20897;…	105450;11540;11542;11556;14599;14672;14675;14685;16008;16009;16840;17684;18126;19223;19664;20481;20617;22408;237880;246103;329828;380714;69601;72832;80794	12189;12566;12912;14728;170472;17938;18126;19014;19285;19664;20423;20602;21416;214572;217166;217351;22034;22185;223527;224008;224045;226151;234594;24116;27103;28019;56347;56717;58202;654804;68219;68845;71389;76246;77011;83383;83602
miR-3751-3p	1099.8	100504467;107895;11409;114886;11666;11815;12190;12443;12913;13134;13144;13876;14083;14178;15245;15466;15900;16333;16334;17126;17385;17703;17874;18028;18508;18641;18787;18854;19218;19883;20111;20174;20230;208266;217303;217351;21812;218271;21873;22436;22654;230801;234135;234371;245867;252973;26367;269060;27878;30841;319552;319760;327826;338366;360013;54126;55982;56386;56703;622434;64010;66105;66789…	13876;21812;21907;22436	11757;12190;12913;13144;13479;14827;16333;16334;17126;18436;18787;18854;20111;20438;20439;21812;22436;22654;230379;234371;26927;432777;53323;66354;74143	72344	22789;280667	12190;12443;12445;13134;13982;16333;16334;16882;17126;18854;18951;20843;211978;215445;21812;223922;234371;234664;237436;237886;237887;26445;380614;50721;50875;55982;59126;621823;67203;70247;74393;75276;76454;78610;98733	17126;18436;18787;18854;19218;22436;230379;432777;65973;77889	114886;17385;21812;56401	15466;19218	100038358;101142;108154;110606;11465;11689;11773;11815;11829;12192;12443;12445;12501;12504;12802;12913;12986;13058;13144;13479;13982;14083;14109;14178;14281;14732;14985;15015;15218;15900;16333;16334;16882;170676;17082;17126;17874;18436;18693;18787;18854;19218;19376;19735;19883;20111;20211;20230;20350;20361;20592;20616;20849;208650;20997;210757;217303;21812;218138;21873;219103;22018;22200;22318;22…	11815;13144;14083;14178;14281;16325;16333;16334;170736;17126;18080;18508;18787;20997;217692;21812;21907;219103;22018;238871;269713;320024;50721;50875;54126;55994;64010;66354;67203;67765;73703;74393;76454	11815;14816;15466;19218;19735;20174;231125;270118;320129;71729	12190;13134;15900;18028;18854;20111;20997;217351;27103;55982
miR-1021	1073.27	12505;14319;16367;16485;17691;17869;18005;18129;22172;23876;29858;338350;73086;76499;83996	12505;13609;15405	12505;17869;18095;230379			11735;17869;18095;18129;19355;211978;22172;22210;235542;76499	170786;17869;18095;20344;230379;56538		11966;67549	100689;108086;12505;12627;13537;13609;140806;15405;16852;171284;17869;18095;18129;19338;20344;22210;230379;73086;75425;80901;81600;83996	13609;16367;16852;17691;17869;18005;18129;20295;20344;21916;76499;83996	18095
miR-82-3p	1043.95	11909;14158;14369;17392;18211;20317;22234;235504;57810;68173		11909;15201;17392;18772;20439;223870;68173			11909;57749;79566	223870	11595	11595;20317	11909;12502;12560;14158;14369;15201;17392;18843;21946;54396;71653;73094	14158;14369;320365;57810	12560	27979

## Sheet: A-miRNA heatmap df
miRNA	mean_TPM	Regulation of biological processe	angiogenesis	apoptotic process	autophagy	cell communication	cell cycle	coagulation	collagen	gastric acid secretion	immune response	muscle cell	receptor	regulation of gene expression
miR-540-3p	39640.7	107	10	41	4	5	56	11	4	7	148	44	19	10
miR-8325-3p	13736.1	68	7	17	1	7	40	2	3	4	93	36	10	8
miR-1692	11352	3	0	2	0	0	2	0	0	0	4	1	0	1
miR-10833	9544.74	42	5	19	2	2	25	1	4	3	67	20	9	8
miR-2904	9193.5	40	4	20	0	0	26	5	3	3	70	25	6	7
miR-10242-5p	8827.61	24	3	6	0	0	11	1	1	3	30	8	2	2
miR-64-3p	7141.36	32	6	10	1	1	21	6	2	1	51	21	4	5
miR-11633-3p	6110.51	44	3	15	4	3	20	4	3	2	57	23	6	5
miR-3488	4566.77	15	1	6	0	0	10	3	0	2	29	7	2	6
miR-10b	4557.37	80	4	30	0	4	39	7	5	6	126	41	8	14
miR-9712-3p	4320.1	54	5	15	3	1	19	5	0	2	61	27	4	6
miR-11912	4296.46	17	2	4	0	2	10	2	0	1	21	12	4	4
miR-571	3968.83	36	5	10	1	3	13	2	2	3	36	18	3	4
miR-12225-3p	3735.66	110	12	45	2	2	69	7	5	3	129	47	11	12
miR-27b-5p	3215.26	64	11	16	3	1	30	6	3	2	64	26	6	9
miR-7548	3165.57	112	9	34	2	2	51	11	3	6	114	48	11	14
miR-5106	3144.37	118	15	32	3	5	54	18	3	5	160	40	17	16
miR-2-5p	2924.55	11	2	8	0	0	4	2	1	0	14	3	3	2
miR-6165	2885.66	121	8	36	2	5	60	15	2	12	175	54	12	11
miR-37-5p	2841.74	169	14	66	5	9	68	21	6	14	223	77	10	23
miR-10597d	2513.2	20	1	5	0	1	9	0	1	0	22	11	1	1
miR-4175-3p	2453.14	5	1	3	0	1	7	0	0	0	9	3	0	0
miR-124b-3p	2432.46	2	0	1	0	0	1	1	0	0	4	1	2	1
miR-4710	2389.75	156	14	61	8	3	88	18	8	13	218	83	18	20
miR-6763-5p	2323.92	152	13	48	2	6	74	11	4	7	191	57	9	25
miR-3150b-3p	2303.15	70	6	21	3	4	52	7	1	4	125	30	12	7
miR-1412	2216.53	117	6	39	1	6	50	23	7	7	155	40	11	15
miR-9830-5p	2138.6	68	5	26	3	3	45	7	3	4	110	31	7	13
miR-126-3p	2088.94	11	3	5	0	1	8	3	0	0	15	5	1	3
miR-7108-3p	2065.41	83	7	27	4	0	58	8	4	4	100	31	10	16
miR-252	2043.13	6	1	0	0	0	2	2	0	0	9	4	0	0
miR-4127-3p	2028.67	8	1	3	0	0	19	1	0	0	28	4	1	6
miR-252b	2020.34	6	1	0	0	0	3	2	0	0	11	4	0	0
miR-252a	1981.67	7	1	0	0	0	4	2	0	1	11	4	0	0
miR-4008b-3p	1690.4	87	11	29	0	6	42	9	3	7	117	34	10	7
miR-1755	1647.5	20	3	5	0	3	6	2	2	1	30	11	4	4
miR-1842	1581.68	130	12	58	6	8	82	18	8	10	208	70	18	29
miR-499b	1535.34	1	0	0	0	0	0	0	0	0	2	2	0	0
miR-4075-5p	1383.44	101	15	42	5	6	49	11	4	0	126	47	16	19
miR-6131	1346.56	83	9	29	1	5	44	13	1	5	120	35	10	13
miR-4618	1342.24	24	2	5	0	0	10	1	1	0	20	6	3	4
miR-34f-5p	1328.14	11	0	7	1	2	10	0	0	0	16	5	3	4
miR-27c-5p	1270.13	0	0	0	0	0	0	0	0	0	1	0	0	0
miR-7648-5p	1259	27	3	15	1	2	20	2	0	2	31	12	6	6
miR-10758	1231.55	91	7	29	3	2	37	5	3	3	104	35	11	15
miR-7190-3p	1206.48	64	7	16	0	1	31	0	1	4	68	37	5	14
miR-16c	1131.51	279	23	98	9	8	134	28	6	20	348	110	25	37
miR-3751-3p	1099.8	70	4	25	1	2	35	10	4	2	104	33	10	10
miR-1021	1073.27	15	3	4	0	0	10	6	0	2	22	12	1	0
miR-82-3p	1043.95	10	0	7	0	0	3	1	1	2	12	4	1	1

## Sheet: B-different biological process
Functions	Target_Counts	Target_genes
cell cycle	1199	320595,30948,19192,19087,57749,60344,56484,13614,16000,70454,216021,240843,69188,22061,12034,26965,69583,320172,12314,12567,23988,235406,72415,22339,100038464,217708,100037258,78832,12877,20843,13709,12445,57028,107771,75079,17319,97122,227937,18611,72508,107951,19206,12649,71819,20877,11477,69710,116871,20104,225182,14048,68014,21376,12952,50721,19047,78294,16589,211978,100502766,13804,211586,12…
regulation of gene expression	356	67219,23892,55982,24116,67772,54427,20922,13626,21803,21405,67177,22410,75030,27224,12491,19664,69833,57432,26908,13198,21410,68877,13134,77011,20638,21429,226151,276770,69745,71902,11545,66467,66266,68705,74370,18126,23996,218333,22695,75514,67673,16210,68379,11835,70428,67996,110809,20958,69241,21399,18789,108121,20383,22057,378430,15387,16909,209354,67543,15258,68995,224045,223527,56322,17749,…
gastric acid secretion	120	14599,76524,114143,11883,67549,14466,11974,20911,26373,20317,27060,74748,11966,19141,53416,14756,269224,52055,19693,27220,18429,14609,72433,110935,72961,74096,211286,21819,228355,15466,19692,12622,69847,72585,11595,12752,56398,213788,12733,20927,20905,18484,14600,11945,20287,193034,12425,16535,11944,19349,108664,19326,16509,18173,279561,14473,22259,66333,11975,319197,21785,171168,11984,11418,1108…
cell communication	116	22789,54725,74927,20356,11434,17304,22418,78081,22157,69286,67690,56644,207818,94332,20778,54713,12745,14129,11571,17470,19876,98985,59083,54698,73456,12469,107934,73182,18186,53604,12462,13383,18551,14131,12491,12767,225825,12461,14595,22787,17235,70417,18646,12465,14430,15511,67331,20686,11497,107970,193740,15482,69165,280667,12801,238680,17687,330908,13845,100038460,17968,50935,12511,76088,136…
muscle cell	999	13052,79362,77578,16416,239719,14066,22349,67254,56193,57784,19094,17868,16623,665113,228785,21812,229302,18590,14560,12425,22340,18815,55994,170736,100862247,192119,15182,11475,94175,13710,21809,71461,19130,16765,13831,15162,436199,50874,20295,15205,320024,69538,19317,80297,319720,11480,21923,22408,16449,12803,83431,384061,12176,12390,14180,14234,19271,13819,68054,232174,22608,634340,14159,50791…
angiogenesis	212	12774,219033,16413,17130,320739,11684,280635,18750,56737,11745,432940,14175,15289,11535,16412,71093,18654,12165,18015,67653,55985,15945,68813,630952,18128,15214,14815,21803,52679,14173,23892,68992,26416,13001,30878,17295,18591,11482,15405,12562,19664,18814,13198,11816,69660,75596,13642,66923,21814,69193,20423,20583,109905,13388,105450,14702,67888,21907,17390,13636,20349,13856,68678,18747,320924,1…
receptor	242	17999,16846,72183,14313,18387,268934,109593,20779,12952,213326,270118,72514,16840,19165,67296,12638,14118,12010,14119,434246,18570,317653,216869,12343,18595,16153,14773,83946,11553,12387,18596,18125,271457,606496,11477,108069,14602,231125,18736,11815,16008,11609,207425,15242,16332,11539,15559,170758,105940408,12306,70790,20304,23893,18186,213452,101540,16006,20174,11486,11490,16000,11688,70839,13…
immune response	3065	19777,51811,15227,11806,17524,69871,14276,22359,18950,64213,226422,20259,100038460,57741,170749,19017,106504,433586,20292,15974,242100,16776,106565,231532,18035,20563,12944,217864,232947,67307,22320,12268,13853,14254,28078,269378,14463,20852,12576,244202,26406,18436,110382,16569,53314,56441,20211,69908,74048,224754,20389,319520,26438,319940,108960,21416,14154,69368,54607,13841,237310,101568,76850…
Regulation of biological processe	2201	67888,78783,69181,140858,252973,241593,245867,17703,30949,21849,20423,56449,19125,103963,78605,671535,19302,18176,105675,211673,20230,16400,83436,11555,12361,59005,26365,71745,14168,18478,16189,11745,18479,78920,11545,11596,74996,14719,18195,83557,12177,67267,19340,68889,14245,109552,16011,68992,13405,218271,72117,192654,69697,19325,18508,224530,17967,217664,18383,333433,74019,243382,78656,11482,…
coagulation	248	18567,19016,432478,15528,14071,12490,13852,16433,22413,574429,26754,12042,627984,215114,12905,13063,19142,18747,18048,18791,70186,11783,20344,18095,66593,16621,11905,14062,21672,14598,13666,99571,110135,72828,114868,76080,14061,12578,12633,18024,19144,216799,545925,14726,105722,20201,71753,67628,12049,223870,16604,73916,114774,72242,26439,20846,11555,100126224,26885,20617,22325,319415,71145,16613…
apoptotic process	794	14082,57875,18706,12125,432777,12046,100503619,27050,12062,56426,14377,58801,83925,12235,14084,78688,18854,21945,16193,14272,108058,20215,17000,13132,329244,21936,50873,76987,75778,112407,51792,433759,12045,18761,12981,22184,21973,59009,16333,53380,606496,56505,74754,56717,18174,16202,11826,20379,17153,12399,216795,226830,19645,269523,19165,20723,14360,21416,13032,17762,11740,21926,54683,18436,10…
collagen	88	26433,56429,74041,18596,12831,18015,23837,223864,17300,114886,21808,56401,210719,11596,20319,81877,216725,16412,94352,16917,24111,13078,18706,14264,12815,22226,12814,16193,16948,12818,20293,12824,12306,21803,11800,23892,16173,67772,18214,12843,66214,20289,17022,18451,15182,17385,11595,20377,21812,19016,16147,237360,74155,12159,22417,12832,268977,14219,14062,11977,109905,16398,20296,13805,30955,11…
autophagy	72	218832,108079,227738,117150,15251,22059,192656,18412,22084,50754,54673,13000,381038,22642,72145,56480,56456,26417,24088,56717,12177,19943,20924,14367,108121,228361,606496,56505,20788,74244,12424,108083,67443,22241,19328,229722,13043,77124,93759,245860,12257,226407,66597,22333,18475,228993,74006,257632,11555,319801,71865,72344,20787,11793,13853,73674,107607,56208,68943,213948,56367,14534,13038,278…

## Sheet: C-immune respons barplot
GO_term	Functions	target_genes
GO:0007219	Notch signaling pathway	124
GO:0002474	antigen processing and presentation of peptide antigen via MHC class I	118
GO:0002274	myeloid leukocyte activation	118
GO:0002221	pattern recognition receptor signaling pathway	113
GO:0002821	positive regulation of adaptive immune response	112
GO:0019884	antigen processing and presentation of exogenous antigen	110
GO:0070661	leukocyte proliferation	108
GO:0071346	cellular response to interferon-gamma	107
GO:0071347	cellular response to interleukin-1	107
GO:0050868	negative regulation of T cell activation	103
